# Supplementary material for: Environmental Law Reform Needed to Manage Trade of Australia’s Threatened Marine Species
Source: Preprints.org preprint supplement (doi:10.20944/preprints202404.0242.v1), 2024-04-03
Supplement: Supplementary file 3 [file supplementary]

# Supplementary Table S1. **Summary of status of species listed under Australia’s Environmental Protection and Biodiversity Conservation Act or the IUCN Red List and exported by Australia since their listing (live-weight equivalent).**

| **Scientific name** | **Common name** | **Volume exported since listing (tonnes)** | **Current IUCN listing** | **First IUCN listing** | **CITES listing** | **EPBC Category** | **AFMA biomass status** | **FRDC stock status** | **References** |
| --- | --- | --- | --- | --- | --- | --- | --- | --- | --- |
| *Galeorhinus*  *galeus* | School shark, tope | 689 (EPBC), 1106 (IUCN) | CR, decreasing (2020) | VU (2000) | NA | Conservation Dependent (2009) | Overfished | Depleted | FRDC Stock status dataset (<https://www.fish.gov.au/-/media/stockstatus2020table/stockstatus2020table.ashx?la=en>, Accessed January 2024) ;AFMA biomass status (<https://www.afma.gov.au/species>);AFMA stock rebuilding strategy20; SPRAT species profile (<https://www.environment.gov.au/cgi-bin/sprat/public/publicspecies.pl?taxon_id=68453>) |
| *Hoplostethus*  *atlanticus* | Orange roughy | 2871 (EPBC)* | VU, unknown (European region; 2015) | VU (European region; 2015) | NA | Conservation Dependent (2006) | Two of four overfished | Three stocks depleted, one undefined, two sustainable | FRDC Stock status dataset (<https://www.fish.gov.au/-/media/stockstatus2020table/stockstatus2020table.ashx?la=en>, Accessed January 2024);AFMA biomass status (<https://www.afma.gov.au/species>); [AFMA stock rebuilding strategy (2022)](https://www.afma.gov.au/sites/default/files/2023-02/orange-roughy-rebuilding-strategy-2022.pdf); No TSSC Listing Advice available |
| *Thunnus maccoyii* | Southern bluefin tuna | 103,022 (EPBC), 173,863 (IUCN) | EN, recovering (2021) | CR (1996) | NA | Considered in 2005; listed as Conservation Dependent (2010) | Not overfished | Sustainable | FRDC Stock status dataset (<https://www.fish.gov.au/-/media/stockstatus2020table/stockstatus2020table.ashx?la=en>, Accessed January 2024);AFMA biomass status (<https://www.afma.gov.au/species>); SPRAT species profile (<http://www.environment.gov.au/cgi-bin/sprat/public/publicspecies.pl?taxon_id=69402>) |
| *Xiphias*  *gladius* | Swordfish | 23,275 | NT, decreasing (2021) | DD (1996) | NA | NA | Not overfished | Two sustainable | FRDC Stock status dataset (<https://www.fish.gov.au/-/media/stockstatus2020table/stockstatus2020table.ashx?la=en>, Accessed January 2024);AFMA biomass status (<https://www.afma.gov.au/species>) |
| *Thunnus*  *obesus* | Bigeye tuna | 20,969 | VU, decreasing (2021) | VU (1996) | NA | NA | One of two subject to overfishing | One of two depleting | FRDC Stock status dataset (<https://www.fish.gov.au/-/media/stockstatus2020table/stockstatus2020table.ashx?la=en>, Accessed January 2024); AFMA biomass status (<https://www.afma.gov.au/species>) |
| *Scomberomorus*  *commerson* | Narrow-barred spanish mackerel; spanish mackerel | 1,389 | NT, decreasing (2022) | NT (2011) | NA | NA | NA | One of five depleting | FRDC Stock status dataset (<https://www.fish.gov.au/-/media/stockstatus2020table/stockstatus2020table.ashx?la=en>, Accessed January 2024); AFMA stock assessment21 |
| *Cherax*  *destructor* | NA | 354 | VU, unspecified trend (1996) | VU (1996) | NA | NA | NA | NA | NA |
| *Pomatomus*  *saltatrix* | Blue fish | 89 | VU, decreasing (2015) | VU (2015) | NA | NA | NA | NA | NA |
| *Seriolella*  *brama* | Blue warehou | 34 | NA | NA | NA | Conservation Dependent (2015) | Overfished | Two depleted | FRDC Stock status dataset (<https://www.fish.gov.au/-/media/stockstatus2020table/stockstatus2020table.ashx?la=en>, Accessed January 2024);AFMA biomass status (<https://www.afma.gov.au/species>); [AFMA stock rebuilding strategy (2022](https://www.afma.gov.au/sites/default/files/2023-02/blue-warehou-rebuilding-strategy-2022.pdf)); SPRAT species profile (<https://www.environment.gov.au/cgi-bin/sprat/public/publicspecies.pl?taxon_id=69374>) |
| *Carcharhinus*  *sorrah* | Spot-tail shark | 8.5 | NT, decreasing (2020) | NT (2009) | Appendix II (2023) | NA | NA | Sustainable | FRDC Stock status dataset (<https://www.fish.gov.au/-/media/stockstatus2020table/stockstatus2020table.ashx?la=en>, Accessed January 2024) |
| *Bathyraja*  *irrasa* | Kerguelen sandpaper skate | 7.2 | VU, decreasing (2019) | NT (2009) | NA | NA | NA | Undefined Stock | FRDC shark report (<https://fish.gov.au/docs/SharkReport/2023_FRDC_Bathyraja_irrasa_Final.pdf>) |
| *Carcharhinus*  *amboinensis* | Pigeye shark | 5.1 | VU, decreasing (2020) | DD (2000) | Appendix II (2023) | NA | NA | NA | FRDC shark report (<https://fish.gov.au/docs/SharkReport/FRDC_Carcharhinus_amboinensis.pdf>) |
| *Somniosus pacificus* | Pacific sleeper shark | 3.1 | NT, decreasing (2019) | DD (2009) | NA | NA | NA | NA | NA |
| *Makaira*  *nigricans*** | Blue marlin | 2.8 | VU, decreasing (2021) | VU (2011) | NA | NA | NA | NA | AFMA Western Tuna and Billfish Management Arrangements (<https://www.afma.gov.au/sites/default/files/2023-03/2023-wtbf-management-arrangements-booklet.pdf>) |
| *Eusphyra*  *blochii* | Winghead shark | 1.04 | EN, decreasing (2015) | NT (2003) | Appendix II (2023) | NA | NA | Sustainable; bycatch | FRDC shark report (<https://fish.gov.au/docs/SharkReport/FRDC_Eusphyra_blochii.pdf>) |
| *Lamna nasus** **** | Porbeagle | 0.82 | VU, decreasing (2018) | VU(1996) | Appendix III (FR 2013); Appendix II (several countries; 2015) | Migratory | NA | NA | SPRAT species profile (<http://www.environment.gov.au/cgi-bin/sprat/public/publicspecies.pl?taxon_id=83288>); AFMA small pelagic fishery assessment (<https://www.dcceew.gov.au/sites/default/files/documents/small-pelagic-fishery-reassessment-2023.pdf>) |
| * IUCN listing for the European Region only | | | | | | | | | |
| ** Retention of bycatch permitted only if the specimen is brought up dead to the boat; if alive, it must be returned to the water | | | | | | | | | |
| *** Can be traded domestically | | | | | | | | | |
